# Supplementary material
Source: PubMed Central journal article supplement (PMC2515592)

## **Supplementary Materials**

I. Strug et al. “Vaccinia peptides eluted from HLA-DR1 isolated from virus-infected cells are recognized by CD4+ T cells from a vaccinated donor. “

### **Supplementary Figure 1.** Ion chromatograms.

#### Figure Legend

Base peak (most abundant ion) and specific ion intensity plots for fractions containing (A) the highly abundant endogenous peptide derived from MHC class I (B) vaccinia peptide I6L [338-352], (C) vaccinia peptide A10L [393-307] , and (D) the internal control HA peptide. No distinct peak in either base peak or specific ion plots was observed for the lower abundance vaccinia peptide D6R [157-171].

**Supplementary Table I** - Peptides from infected cells

**Supplementary Table II** - Peptides from control cells



|                                                                      |              |                              |   |   |        |      |       |                               |          |          |   |         |        |
|----------------------------------------------------------------------|--------------|------------------------------|---|---|--------|------|-------|-------------------------------|----------|----------|---|---------|--------|
| RAB14, member RAS oncogene family                                    | gij13543869  | RSTYNHLSSWLTDR               | R | N | 95.00% | 3.12 | 0.226 | 603.336                       | 1806.983 | 1806.889 | 3 | 1.102   | 609.5  |
| core protein 4a precursor [Vaccinia virus]                           | gij47088449  | SMRYQSLPRLVEFF               | I | P | 95.00% | 3.01 | 0.128 | 943.554                       | 1885.092 | 1886.000 | 2 | 0.1001  | 53.07  |
|                                                                      |              | SLIPRLVEFF                   | Q | P | 95.00% | 2.38 | 0.162 | 610.872                       | 1219.728 | 1220.705 | 2 | 0.0317  | 26     |
| Saccharopine dehydrogenase                                           | gij20071563  | VATPIAMVQAAMTLSSDASHLPKAGGVF | Y | T | 76.40% | 2.99 | 0.159 | M7 & M12: Oxidation (+16.00)  | 943.447  | 2827.316 | 3 | -0.1448 | -51.19 |
| MSTP123                                                              | gij33338046  | ENSPNVFGLAAWNLPPAGH          | G | H | 90.00% | 2.98 | 0.16  | 789.289                       | 2364.844 | 2364.214 | 3 | 1.637   | 692    |
| Ankyrin repeat domain 47                                             | gij42490769  | WFRVSSORRSQAEPVARMLEGVRR     | E | L | 91.70% | 2.97 | 0.237 | 968.327                       | 2901.959 | 2901.549 | 3 | 1.418   | 488.4  |
| Adenylosuccinate synthase like 1                                     | gij28839610  | EALHGPPKKILVEGANALLDI        | Y | D | 95.00% | 2.97 | 0.219 | 756.702                       | 2267.081 | 2269.292 | 3 | -1.203  | -530.6 |
| B-cell receptor CD22 precursor                                       | gij8166019   | APEPSTVQILHSPAVEGSQ          | Y | V | 95.00% | 2.92 | 0.325 | 974.016                       | 1946.017 | 1946.983 | 2 | 0.042   | 21.57  |
| immunoglobulin heavy chain variable region                           | gij80616384  | TSANTDYMELRGLTSED            | D | T | 91.70% | 2.9  | 0.223 | M8: Oxidation (+16.00)        | 959.479  | 1916.941 | 2 | -0.8849 | -461.4 |
| immunoglobulin mu heavy chain                                        | gij54780570  | QVQLQQWVQAGLLEPSETLPLT       | - | C | 69.60% | 2.85 | 0.128 | 770.046                       | 2307.113 | 2308.219 | 3 | -0.0982 | -42.52 |
| PREDICTED: similar to zinc finger CCOH type containing 12A isoform 3 | gij89035093  | VSPATSTAKPQSTT               | L | S | 95.00% | 2.78 | 0.179 | 496.802                       | 1487.383 | 1488.791 | 3 | -0.4009 | -269.3 |
| Profilin 1                                                           | gij34785533  | VPKTFVNITPAEVGVL             | A | V | 95.00% | 2.76 | 0.345 | 871.428                       | 1740.840 | 1740.990 | 2 | 0.8578  | 492.5  |
| Zinc finger FYVE domain-containing protein 16                        | gij50401753  | YLNDLDSALIPVIHGGTSSNSLPLEI   | H | E | 79.10% | 2.75 | 0.227 | 913.888                       | 2738.641 | 2738.425 | 3 | 1.223   | 446.6  |
| Leukotriene A4 hydrolase                                             | gij21618615  | SVPKELVALMSAIRDGETP          | V | D | 73.40% | 2.72 | 0.166 | 672.011                       | 2013.010 | 2013.069 | 3 | 0.9481  | 470.8  |
| cathepsin S preproprotein                                            | gij23110962  | TGKLVSLSAQNLDV               | K | C | 95.00% | 2.72 | 0.239 | 723.037                       | 1444.059 | 1444.801 | 2 | 0.2657  | 183.9  |
| Fibrinogen beta chain                                                | gij78395029  | SLRPAPPPISGGYRPARP           | P | K | 65.50% | 2.7  | 0.245 | 640.976                       | 1919.903 | 1920.057 | 3 | 0.854   | 444.6  |
| Solute carrier family 38                                             | gij25955655  | IRDFIFGIGASAAAM              | T | L | 95.00% | 2.69 | 0.195 | M15: Oxidation (+16.00)       | 786.862  | 1571.709 | 2 | 0.9272  | 589.6  |
| Sestrin-3                                                            | gij20141774  | FLVEEYSTSGRLDNITQV           | N | M | 77.50% | 2.69 | 0.164 | 691.054                       | 2070.139 | 2071.035 | 3 | 0.1118  | 53.99  |
| ST6 beta-galactosamide alpha-2,6-sialyltransferase 1                 | gij45708716  | HPNQPFYILKPQMPWE             | L | L | 95.00% | 2.51 | 0.29  | 1012.842                      | 2023.667 | 2025.006 | 2 | -0.3309 | -163.5 |
| RAB4B, member RAS oncogene family                                    | gij28422140  | SRETYNSLAAWLTDART            | T | L | 91.80% | 2.44 | 0.306 | 977.401                       | 1952.787 | 1954.962 | 2 | -1.168  | -597.7 |
| Transmembrane protein 127                                            | gij25058970  | GASILATAANLLRHYPY            | G | E | 95.00% | 2.42 | 0.341 | 884.767                       | 1767.519 | 1768.971 | 2 | -0.4447 | -251.5 |
| major histocompatibility complex, class I, B                         | gij17986001  | RPAGDRTFQKWAAVVPSGEE         | T | Q | 80.60% | 2.41 | 0.181 | 767.668                       | 2299.981 | 2300.179 | 3 | 0.8093  | 351.7  |
| Procollagen-lysine 1, 2-oxoglutarate 5-dioxygenase 1                 | gij16741721  | ISNIYLIKGSALRGEL             | Y | Q | 82.10% | 2.41 | 0.232 | 874.359                       | 1746.702 | 1747.012 | 2 | 0.6982  | 399.5  |
| KIAA0528 protein                                                     | gij109658768 | VSARSVKLDRHNPDE              | V | P | 94.00% | 2.4  | 0.237 | 650.264                       | 1947.767 | 1949.057 | 3 | -0.2821 | -144.8 |
| unnamed protein product                                              | gij50833928  | AQLLWTLQDRMGRRPG             | A | G | 70.30% | 2.35 | 0.186 | 864.246                       | 1726.477 | 1725.912 | 2 | 1.574   | 910.9  |
| steroid regulatory element binding transcription factor 1 isoform a  | gij52630419  | AGDAVSVATLAEIYVAAALRVK       | C | T | 59.20% | 2.35 | 0.298 | 1095.383                      | 2188.750 | 2188.234 | 2 | 1.524   | 695.9  |
| Unknown gene product                                                 | gij3417294   | VGQLQSVPTLNSPIYMAKQK         | S | G | 80.80% | 2.35 | 0.162 | 678.111                       | 2031.308 | 2032.054 | 3 | 0.2618  | 128.8  |
| REX2, RNA exonuclease 2 homolog                                      | gij85397892  | RGVREGGAAMAAGESMA            | A | Q | 95.00% | 2.33 | 0.227 | M10 & M16: Oxidation (+16.00) | 827.593  | 1653.171 | 2 | 1.43    | 864.7  |
| Chromosome 22 open reading frame 16                                  | gij40806990  | AVGSAVGHVMSALTGAF            | V | S | 91.60% | 2.33 | 0.177 | 544.323                       | 1629.944 | 1631.822 | 3 | -0.8697 | -533.3 |
| ATP-binding cassette sub-family B member 8                           | gij13123950  | VOIPLLLGQLVKVAK              | N | Y | 90.50% | 2.25 | 0.272 | 859.391                       | 1716.766 | 1718.131 | 2 | -0.3568 | -207.7 |



|                                                                      |             |                                      |   |   |        |      |       |                            |         |         |         |   |        |      |
|----------------------------------------------------------------------|-------------|--------------------------------------|---|---|--------|------|-------|----------------------------|---------|---------|---------|---|--------|------|
| ATP synthase, H+ transporting, mitochondrial F0 complex, subunit c   | gi 2490988  | PKFEVIEKPQA                          | D | - | 95.00% | 2.84 | 0.160 |                            | 643.29  | 1284.56 | 1285.72 | 2 | -0.15  | -12C |
| TP5311 protein                                                       | gi 73909101 | TLAETGLMSLGIALLLSRLLFVV              | A | I | 74.50% | 2.70 | 0.176 | M8: Oxidation (+16)        | 863.45  | 2587.34 | 2587.55 | 3 | 0.79   | 310  |
| hypothetical protein                                                 | gi 50949934 | AYQANILVEDATIGIVDNELLTS              | G | S | 70.70% | 2.69 | 0.110 |                            | 821.65  | 2461.93 | 2462.27 | 3 | 0.67   | 270  |
| Mitochondrial 28S ribosomal protein S22                              | gi 13633893 | SWEERDRMIQVYFPKEGR                   | A | K | 62.10% | 2.69 | 0.190 |                            | 776.51  | 2326.52 | 2326.14 | 3 | 1.4    | 600  |
| Regulatory factor X, 5 (influences HLA class II expression)          | gi 17028337 | AEVPSVSEASGQAPPAKAKQDIEDTASDAKRR     | T | R | 87.80% | 2.68 | 0.121 |                            | 1089.36 | 3265.07 | 3265.67 | 3 | 0.41   | 130  |
| NMDA receptor-binding protein yotiao                                 | gi 7513208  | QYQEHQQATELLRQAHPQM                  | R | E | 95.00% | 2.66 | 0.211 |                            | 823.44  | 2467.29 | 2467.16 | 3 | 1.1    | 460  |
| Interleukin 10 receptor, beta                                        | gi 12804903 | IIGPPGMQVEVLLADSLHMPRF               | T | L | 87.00% | 2.62 | 0.165 |                            | 737.68  | 2210.01 | 2210.15 | 3 | 0.87   | 390  |
| Putative helicase Mov101                                             | gi 22095856 | IDDMIYFSSDAVTSRV                     | M | L | 81.10% | 2.61 | 0.162 |                            | 606.78  | 1817.31 | 1818.86 | 3 | -0.55  | -30C |
| Protocadherin beta 16                                                | gi 23271279 | PRSATATLHVLLVDGFSQPFLPLP             | P | E | 78.70% | 2.60 | 0.184 |                            | 859.77  | 2576.29 | 2576.42 | 3 | 0.87   | 340  |
| mitochondrial tumor suppressor 1 isoform 3                           | gi 50348622 | MTYTAFSDVVMQ                         | D | S | 94.70% | 2.60 | 0.201 |                            | 696.33  | 1390.64 | 1392.62 | 2 | -0.97  | -70C |
| KIAA1737                                                             | gi 22713560 | AWAKLQASLTPGSSNTGSDLEA               | Q | F | 68.10% | 2.59 | 0.131 |                            | 734.97  | 2201.9  | 2204.08 | 3 | -1.2   | -53C |
| PEST proteolytic signal containing nuclear protein                   | gi 18314420 | SIKLGSSPKKTVPTLA                     | I | P | 81.40% | 2.58 | 0.141 |                            | 878.61  | 1755.21 | 1756.02 | 2 | 0.19   | 110  |
| Proteasome-associated protein ECM29 homolog (Ecm29)                  | gi 61212960 | AEQVEPLEAVLHLVIASSDTRHS              | E | V | 64.10% | 2.58 | 0.200 |                            | 834.86  | 2501.56 | 2501.3  | 3 | 1.3    | 510  |
| similar to Argininosuccinate synthase (Citrulline--aspartate ligase) | gi 51095136 | MEGKVQVPIFKGVQ                       | Q | H | 75.10% | 2.58 | 0.131 |                            | 780.38  | 1558.74 | 1559.86 | 2 | -0.12  | -75  |
| OTU domain containing 7A                                             | gi 18702331 | SPARAAALRTVNTVESLARAVPGALPGAAGTAGAAE | Y | H | 95.00% | 2.58 | 0.225 |                            | 1115.74 | 3344.18 | 3344.8  | 3 | 0.39   | 120  |
| LOC51334 protein                                                     | gi 62201630 | LENGGMGISHNSFPPIR                    | P | P | 89.50% | 2.52 | 0.130 |                            | 638.49  | 1912.44 | 1912.93 | 3 | 0.51   | 270  |
| ZNF532 protein                                                       | gi 71051469 | MTMGDMKTPDFDILLAA                    | - | F | 70.10% | 2.52 | 0.148 | M3 and M6: Oxidation (+16) | 635.28  | 1902.81 | 1903.81 | 3 | 0.0023 | 1.2  |
| hypothetical protein CG003                                           | gi 12957488 | WSNTSPVGNNGYIKPPVPPASGTHREK          | S | G | 95.00% | 2.51 | 0.271 |                            | 925.77  | 2774.28 | 2776.42 | 3 | -1.1   | -41C |
| Chromosome X open reading frame 26                                   | gi 30354299 | SLPAESYGNPDIEMAWAM                   | L | R | 90.50% | 2.50 | 0.188 |                            | 699.45  | 2095.34 | 2096.9  | 3 | -0.55  | -26C |
| Capping protein (actin filament), gelsolin-like                      | gi 15778939 | KANEKERQAALQVAEGFISRMQ               | R | Y | 80.90% | 2.48 | 0.186 |                            | 835.27  | 2502.78 | 2504.3  | 3 | -0.52  | -21C |
| Adenylate cyclase type 3 (Adenylate cyclase type III)                | gi 13878450 | TYMAASGVTPDVNTNGF                    | S | A | 81.30% | 2.40 | 0.150 |                            | 582.13  | 1743.36 | 1744.79 | 3 | -0.42  | -24C |
| novel protein                                                        | gi 57209485 | PTLRSGIVMEVPPGNTRACRGK               | I | L | 83.90% | 2.34 | 0.197 | M9: Oxidation (+16)        | 1235.29 | 2468.56 | 2468.32 | 2 | 1.3    | 500  |
| Transcription factor 7-like 1                                        | gi 37590620 | YLSNGPLSPGGARTYLQMK                  | P | W | 95.00% | 2.32 | 0.231 |                            | 685.01  | 2052    | 2053.05 | 3 | -0.046 | -22  |
| PH domain leucine-rich repeat-containing protein phosphatase         | gi 67460982 | LLQVPAEASDEGIVISANEDEPG              | H | L | 75.20% | 2.29 | 0.166 |                            | 785.07  | 2352.17 | 2353.14 | 3 | 0.037  | 16   |

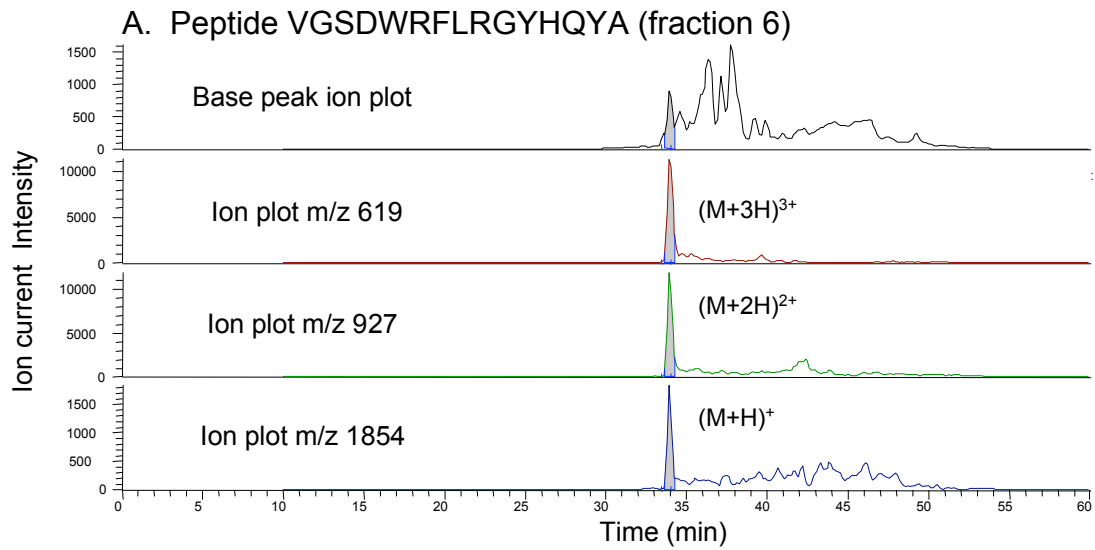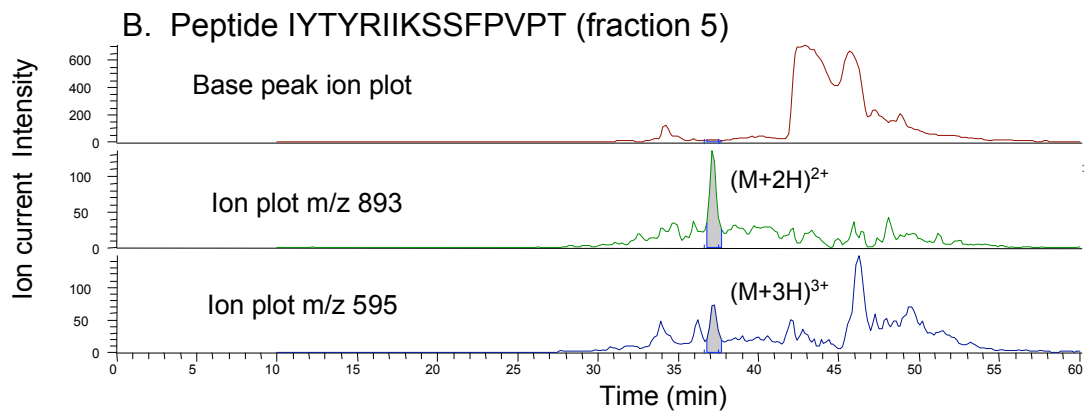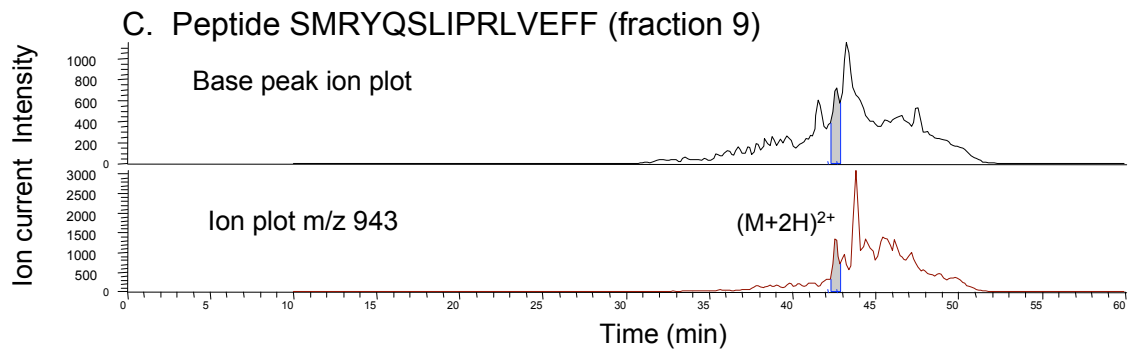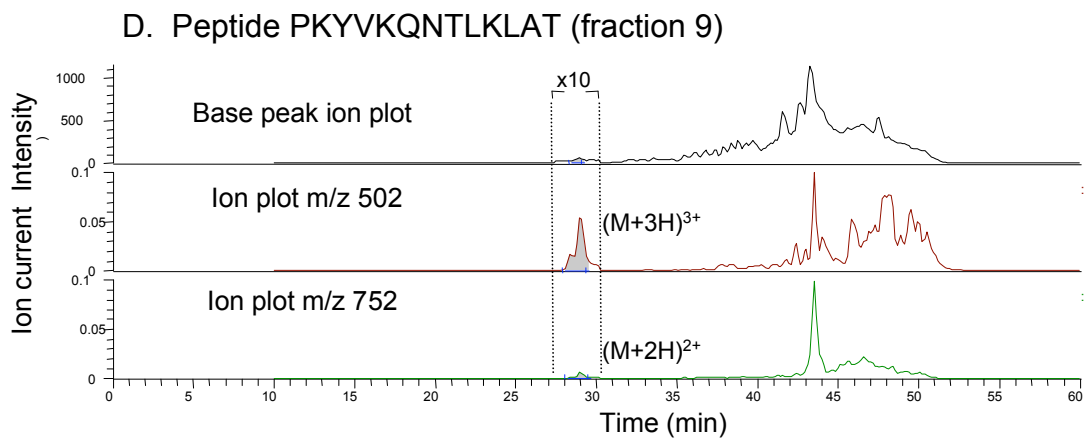

Supplement: NIHMS58401-supplement-1.pdf [file NIHMS58401-supplement-1.pdf]
